# Supplementary material for: Are drug targets with genetic support twice as likely to be approved? Revised estimates of the impact of genetic support for drug mechanisms on the probability of drug approval
Source: PLOS journal article supplement (doi:10.1371/journal.pgen.1008489), 2019-12-12

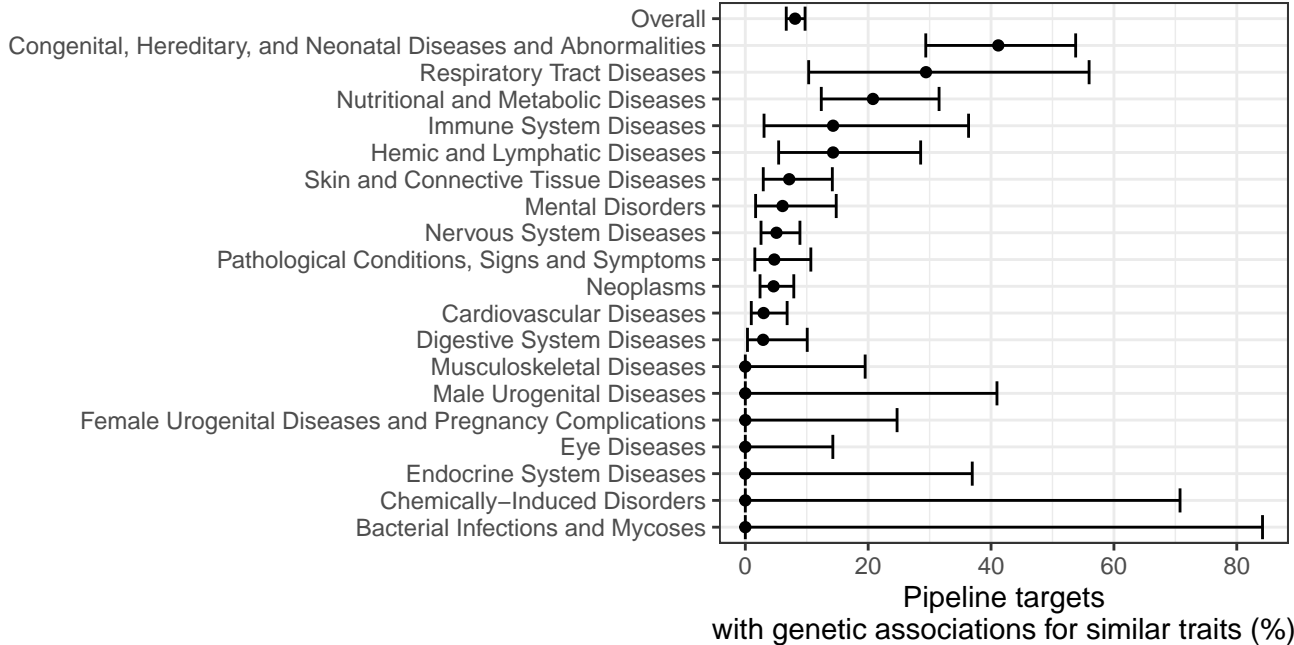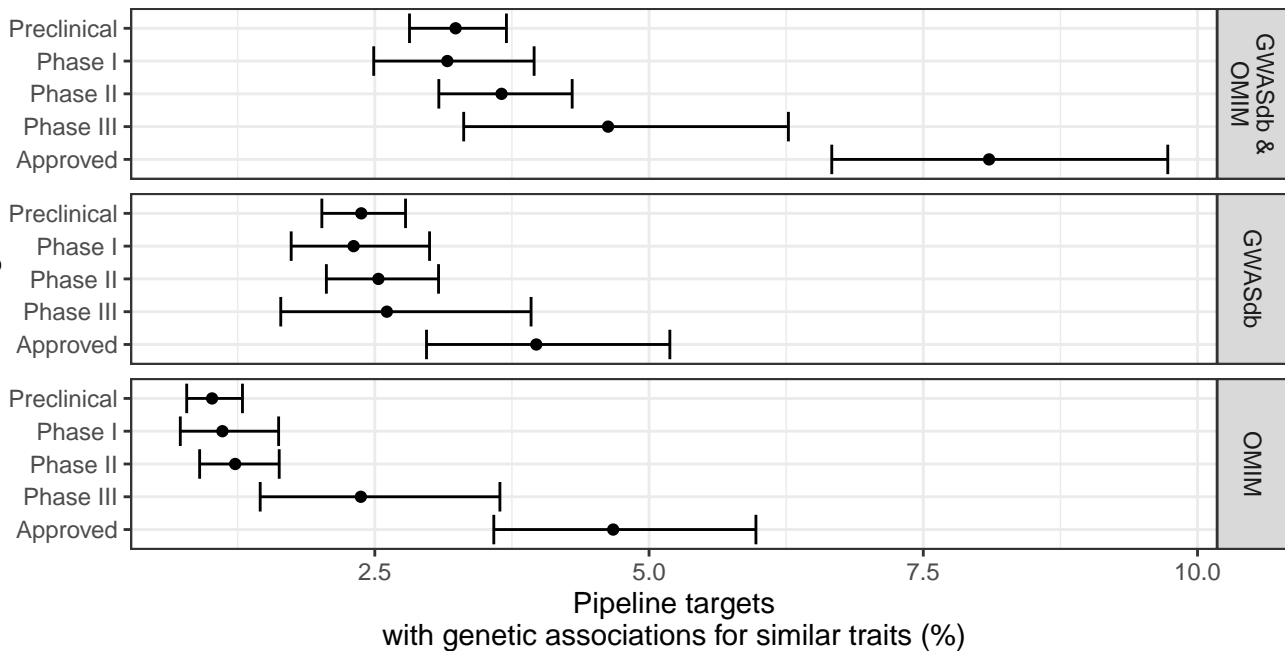

Supplement: S14 (10.1371/journal.pgen.1008489.s014) [file journal.pgen.1008489.s014]
