# Supplementary material for: Are drug targets with genetic support twice as likely to be approved? Revised estimates of the impact of genetic support for drug mechanisms on the probability of drug approval
Source: PLOS journal article supplement (doi:10.1371/journal.pgen.1008489), 2019-12-12
Supplement: S36 (10.1371/journal.pgen.1008489.s036) [file journal.pgen.1008489.s036]

| Source  | Type       | Less | Greater | Equal |
|---------|------------|------|---------|-------|
| Global  | Indication | 0.00 | 0.00    | 1.00  |
| Country | Global     | 0.01 | 0.00    | 0.99  |
| Event   | Global     | 0.01 | 0.02    | 0.97  |
| Event   | Indication | 0.08 | 0.02    | 0.91  |
| Info    | Global     | 0.46 | 0.02    | 0.53  |
| Info    | Indication | 0.50 | 0.02    | 0.48  |
