# Supplementary material for: Are drug targets with genetic support twice as likely to be approved? Revised estimates of the impact of genetic support for drug mechanisms on the probability of drug approval
Source: PLOS journal article supplement (doi:10.1371/journal.pgen.1008489), 2019-12-12
Supplement: S39 (10.1371/journal.pgen.1008489.s039) [file journal.pgen.1008489.s039]

| Event       | GWASdb & OMIM | GWASdb        | OMIM          | N          |
|-------------|---------------|---------------|---------------|------------|
| Progression | 1.5 (1.1-1.8) | 1.2 (0.8-1.6) | 1.9 (1.4-2.4) | 3842 (961) |
| Approval    | 2.5 (1.4-4)   | 2.5 (1.1-4.1) | 2.5 (1-4.6)   | 3842 (172) |
