# Supplementary material for: Are drug targets with genetic support twice as likely to be approved? Revised estimates of the impact of genetic support for drug mechanisms on the probability of drug approval
Source: PLOS journal article supplement (doi:10.1371/journal.pgen.1008489), 2019-12-12
Supplement: S47 (10.1371/journal.pgen.1008489.s047) [file journal.pgen.1008489.s047]

| Property            | Previous | Current | Overlap |
|---------------------|----------|---------|---------|
| Ensembl Genes       | 6045     | 8872    | 4255    |
| MeSH                | 434      | 604     | 232     |
| Associated SNPs     | 13933    | 10815   | 2732    |
| LD SNPs             | 16270    | 18204   | 1562    |
| LD SNP-Gene Links   | 20313    | 27208   | 1304    |
| SNP-Gene Links      | 53526    | 48564   | 6678    |
| MeSH-Gene Links     | 13702    | 36044   | 3535    |
| MeSH-Gene-SNP Links | 65923    | 62043   | 4325    |
